# Supplementary material
Source: publisher figshare collection journal article supplement (https://acs.figshare.com/ndownloader/files/4521442)
Supplement: Supplementary file 1 [file 4521442]

## Supporting Information for

# Magnetic and $^{57}\text{Fe}$ Mössbauer Study of the Single-Molecule Magnet Behavior of a $\text{Dy}_3\text{Fe}_7$ Coordination Cluster

Ghulam Abbas,<sup>†</sup> Yanhua Lan,<sup>†</sup> Valeriu Mereacre,<sup>†</sup> Wolfgang Wernsdorfer,<sup>‡</sup> Rodolphe Clérac,<sup>§,||</sup> Gernot Buth,<sup>≡</sup> Moulay T. Sougrati,<sup>⊥</sup> Fernande Grandjean,<sup>⊥</sup> Gary J. Long,<sup>\*,◇</sup> Christopher E. Anson,<sup>†</sup> and Annie K. Powell<sup>\*,†</sup>

*Institut für Anorganische Chemie, Karlsruhe Institute of Technology, University of Karlsruhe, Engesserstr. 15, D-76131 Karlsruhe, Germany; Institut Néel CNRS, BP 166, 25 av. des Martyrs, F-38042 Grenoble, France; CNRS, UPR 8641, Centre de Recherche Paul Pascal Equipe "Matériaux Moléculaires Magnétiques", 115 avenue du Dr. Albert Schweitzer, F-33600 Pessac, France, Université de Bordeaux, UPR 8641, F-33600, Pessac, France; Institut für Synchrotronstrahlung, Forschungszentrum Karlsruhe, D-76344 Eggenstein-Leopoldshafen, Germany; Department of Physics, University of Liège, B-4000 Sart-Tilman, Belgium, and the Department of Chemistry, Missouri University of Science and Technology, University of Missouri, Rolla, Missouri 65409-0010 USA*

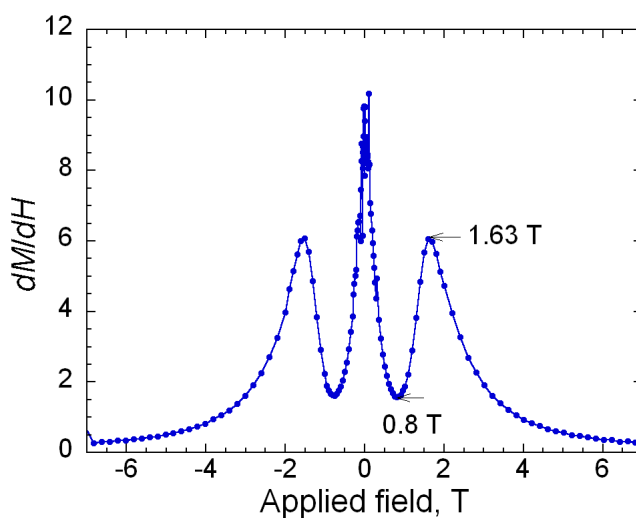

**Figure S1.**  $dM/dH$  vs  $H$  for **1** obtained at 1.8 K.

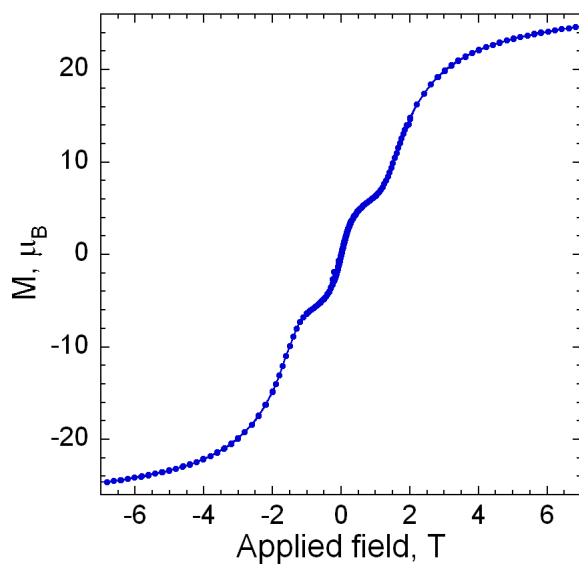

**Figure S2.** The magnetization of **1** obtained at 1.8 K with an applied field sweep rate of 0.002 T/s. Some very weak hysteresis may be observed near zero applied fields.

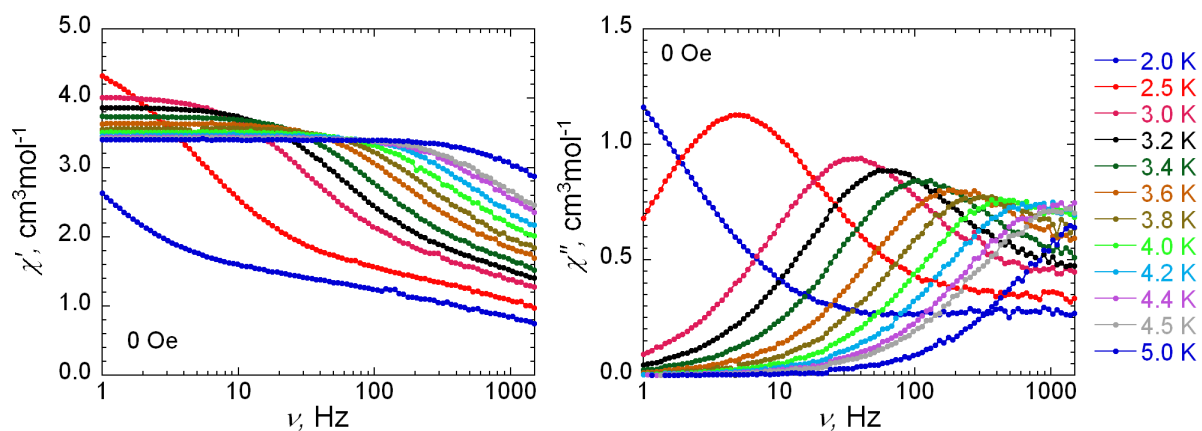

**Figure S3.** Frequency dependence of the in-phase,  $\chi'$ , left, and out-of-phase,  $\chi''$ , right, components of the ac magnetic susceptibility obtained for **1** in a zero dc applied field.

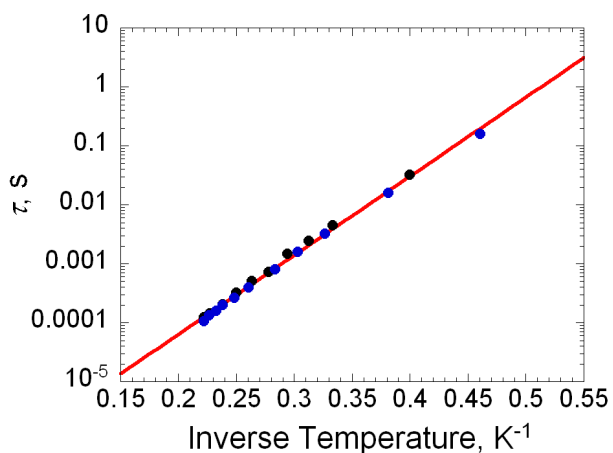

**Figure S4.** An Arrhenius semilog plot of  $\tau$  vs  $1/T$  for **1** obtained from both the temperature dependence and the frequency dependence of the ac susceptibility measurements under zero dc field.

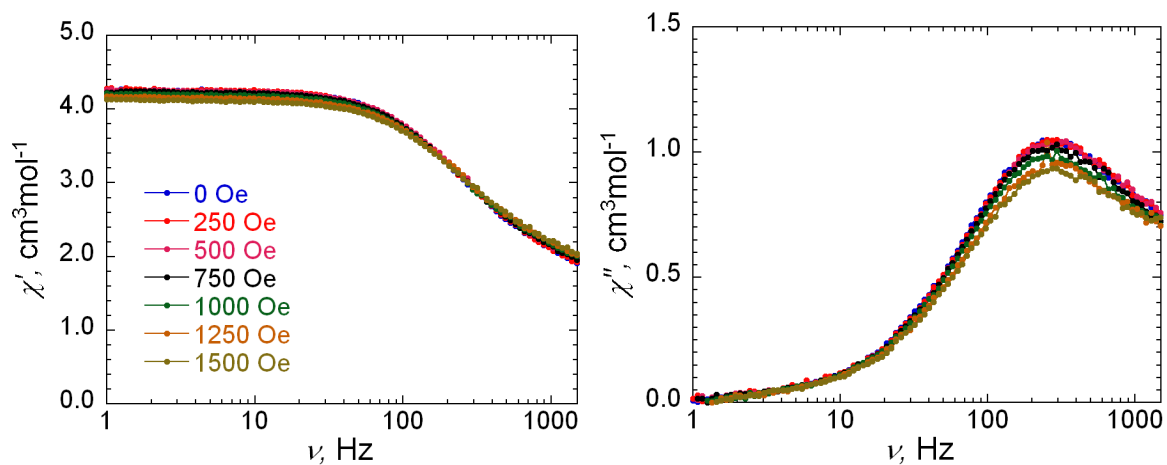

**Figure S5.** The frequency dependence obtained at 3.8 K of the in-phase,  $\chi'$ , left, and the out-of-phase,  $\chi''$ , right, ac susceptibility measured in different dc applied fields for **1**.

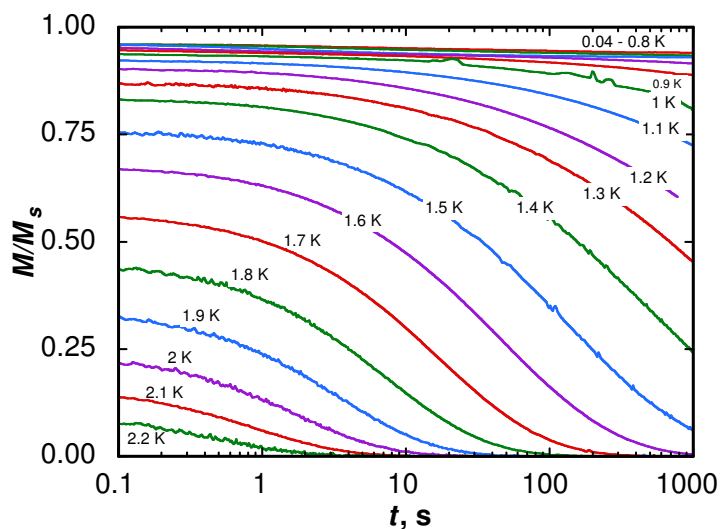

**Figure S6.** The reduced magnetization,  $M/M_s$  vs time decay obtained at zero dc applied field for a single crystal of **1**.
